# Supplementary material for: Reply to: “Current smoking is not associated with COVID-19”
Source: PubMed Central journal article supplement — Eur Respir J. 2020 Jun 4;55(6):2001340. doi: 10.1183/13993003.01340-2020 (PMC7236832; doi:10.1183/13993003.01340-2020), 2020-06-04
Supplement: ERJ-01340-2020.Shareable.pdf [file ERJ-01340-2020.Shareable.pdf]

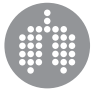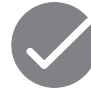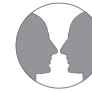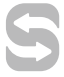

SHAREABLE PDF

# Reply to: “Current smoking is not associated with COVID-19”

Janice M. Leung<sup>1,2</sup>, Chen Xi Yang<sup>1</sup> and Don D. Sin<sup>1,2</sup>

**Affiliations:** <sup>1</sup>Centre for Heart Lung Innovation, University of British Columbia, Vancouver, BC, Canada. <sup>2</sup>Division of Respiratory Medicine, Dept of Medicine, St Paul’s Hospital, Vancouver, BC, Canada.

**Correspondence:** Don D. Sin, Division of Respiratory Medicine, Dept of Medicine, St. Paul’s Hospital, 1081 Burrard Street, Vancouver, BC V6Z1Y6, Canada. E-mail: Don.Sin@hli.ubc.ca

 @ERSpublications  
**Smoking and COPD are risk factors for severe COVID-19** <https://bit.ly/2KJxAbp>

**Cite this article as:** Leung JM, Yang CX, Sin DD. Reply to: “Current smoking is not associated with COVID-19”. *Eur Respir J* 2020; 55: 2001340 [<https://doi.org/10.1183/13993003.01340-2020>].

This single-page version can be shared freely online.

## *From the authors:*

Like M. Rossato and co-workers, we too have been struck by the relative underrepresentation of current smokers in cohorts of coronavirus disease 2019 (COVID-19) patients, particularly in light of our recent findings that the severe acute respiratory syndrome coronavirus 2 (SARS-CoV-2) receptor angiotensin-converting enzyme II (ACE-2) is upregulated in the airway epithelium of this population [1]. China [2], Italy (as reported by M. Rossato and co-workers), and now New York City [3] have all reported current smoking rates below those of their respective general populations. The reason for this is a mystery. One possible explanation is misclassification of smoking status owing to under-reporting of smoking in these cohorts. Another is that smokers may be taking medications that may offer some protection against COVID-19 (e.g. certain inhalers). It should be noted that severe COVID-19 preferentially targets the older population (>65 years) with comorbidities, in whom smoking rates are approximately 3–5 fold lower than that in the general population. Thus, the background smoking rates in the severe COVID-19 susceptible subgroups may be much lower than the general smoking rates of the population. Notwithstanding these issues, we should be extraordinarily cautious about the messaging surrounding smoking and COVID-19, especially in these fraught times where misinformation is commonly amplified in a vacuum of rigorous evidence [4, 5]. We are unaware of any evidence to date that demonstrates that smoking is protective against COVID-19. In fact, although current smoking has not been found to be a major risk factor for COVID-19, COPD patients appear to have worse outcomes upon contracting the virus with an almost threefold odds ratio of dying, needing mechanical ventilation, or being admitted to an intensive care unit [6]. As many of our COPD patients in this pandemic fit an unfavourable demographic profile – elderly, male, and with cardiovascular comorbidities – we would continue to recommend exercising caution in protecting them from COVID-19.
